# Supplementary material for: Role of organic solvent addition to ionic liquid electrolytes for lithium–sulphur batteries
Source: Royal Society of Chemistry journal article supplement (doi:10.1039/c4ra14824j), 2014-12-01
Supplement: c4ra14824j1.pdf [file c4ra14824j1.pdf]

# Role of organic solvent addition to ionic liquid electrolytes for lithium-sulfur batteries

Shizhao Xiong,<sup>a,b</sup> Johan Scheers,<sup>b</sup> Luis Aguilera,<sup>b</sup>  
5 Du-Hyun Lim,<sup>b</sup> Kai Xie,<sup>a</sup> Per Jacobsson<sup>b</sup> and  
Aleksandar Matic<sup>\*b</sup>

Received (in XXX, XXX) Xth XXXXXXXXXX 20XX, Accepted  
Xth XXXXXXXXXX 20XX

DOI: 10.1039/b000000x

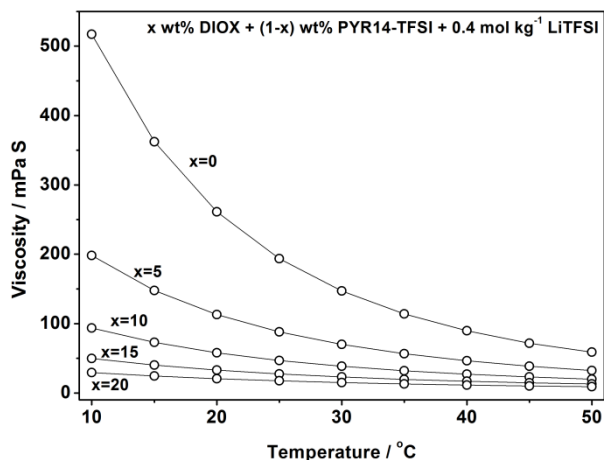

10

Figure S1 Viscosity as a function of temperature for the mixed electrolytes.

## Notes and references

15 <sup>a</sup> Department of Material Science and Engineering, College of Aerospace  
Science and Engineering, National University of Defense Technology,  
Changsha, Hunan, 410073, PR China

<sup>b</sup> Department of Applied Physics, Chalmers University of Technology,  
412 96 Göteborg, Sweden. Fax: +46(0)31-7722090; Tel: +46(0)31-

20 7725176; E-mail: matic@chalmers.se
